# Supplementary material for: Imaging Findings in Patients with Immune Checkpoint Inhibitor-Induced Arthritis
Source: MDPI journal article supplement (doi:10.3390/diagnostics12081961), 2022-08-13
Supplement: s1 [file s1]

**Supplementary Table S1** General characteristics of patients with ICI-induced arthritis with MRI assessment.

| Author [Ref]          | Gender             | Underlying disease                                                            | Preexisting joint disease | Type of CPI                                                                      | Clinical presentation                                                                                     | MRI Findings                                                                                                                                                                            |
|-----------------------|--------------------|-------------------------------------------------------------------------------|---------------------------|----------------------------------------------------------------------------------|-----------------------------------------------------------------------------------------------------------|-----------------------------------------------------------------------------------------------------------------------------------------------------------------------------------------|
| Subedi A [34]         | Male               | Kaposi sarcoma                                                                | Tendinopathy              | Pembrolizumab                                                                    | Inflammatory arthritis                                                                                    | Hand: tenosynovitis of bilateral flexor tendons<br>Hand: Synovitis, marginal erosions and tenosynovitis of the extensor and flexor, periarticular marginal bone edema in carpal and MCP |
| Subedi A [34]         | Male               | Thyroid cancer                                                                | Tendinopathy              | Pembrolizumab                                                                    | Inflammatory arthritis                                                                                    | Hand: tenosynovitis of extensors<br>Hand: Multifocal osseous erosions in distal radius, distal ulna, carpal and MCP bones, synovitis intercarpal joints and tenosynovitis               |
| Subedi A [34]         | Female             | Urothelial carcinoma                                                          | OA                        | Nivolumab                                                                        | Inflammatory arthritis                                                                                    | Hand: no erosions, tenosynovitis or synovitis                                                                                                                                           |
| Subedi A [34]         | Female             | Cervical cancer                                                               | None                      | Nivolumab                                                                        | Inflammatory arthritis                                                                                    | Knee: Moderate effusion and diffuse thickening of synovium<br>Ankle: joint effusion, thickening of tibiotalar joint synovium, peroneal tenosynovitis                                    |
| Subedi A [34]         | Female             | Colon cancer                                                                  |                           | Avelumab                                                                         | Inflammatory arthritis                                                                                    | Hand: Erosions at the radial styloid<br>Ankle: tibiotalar and subtalar joint effusions with marked synovitis                                                                            |
| Subedi A [34]         | Female             | Pheochromocytoma                                                              | None                      | Nivolumab and ipilimumab                                                         | Inflammatory arthritis                                                                                    | Spine: cervical and thoracic spine showing widespread contrast uptake in the sternocostal joint (arrow in facet joints and costovertebral joints)                                       |
| Subedi A [34]         | Female             | Cervical cancer                                                               | None                      | Bintrafusp alfa                                                                  | Inflammatory arthritis                                                                                    | Leg: Diffuse edema in both gastrocnemius muscle and fascia, and abnormal facial signal intensity and enhancement                                                                        |
| Subedi A [34]         | Female             | Lung cancer                                                                   | RA                        | Bintrafusp alfa                                                                  | Inflammatory arthritis                                                                                    | -Prominent joint involvement (n=3)<br>-Periarticular pattern: tenosynovitis with more prominent myositis and/or fasciitis in the surrounding tissues                                    |
| Cappelli LC [16]      | Male               | Renal Cell Carcinoma                                                          | NA                        | Nivolumab and ipilimumab                                                         | Inflammatory arthritis                                                                                    | -Myofasciitis (n=3)                                                                                                                                                                     |
| Feist J [35]          | Male               | Melanoma                                                                      | None                      | Nivolumab                                                                        | SpA-Like                                                                                                  |                                                                                                                                                                                         |
| Kobak S [36]          | Male               | Lung adenocarcinoma                                                           | NA                        | Pembrolizumab                                                                    | Oligoarthritis                                                                                            |                                                                                                                                                                                         |
| Daoussis D [24]       | 10 cases<br>8 Male | Lung carcinoma (n=4)<br>Bladder (n=3)<br>Renal cancer (n=2)<br>Melanoma (n=1) | NA                        | Nivolumab (n=7)<br>Pembrolizumab (n=1)<br>Durvalumab (n=1)<br>Atezolizumab (n=1) | -Prominent joint involvement (n=3)<br>-Prominent 'periarticular' involvement (n=4)<br>-Myofasciitis (n=3) |                                                                                                                                                                                         |
| Current series Case 1 | Male               | Acute myeloid leukemia                                                        | Uveitis HLA-B27 positive  | Anti-TIM3                                                                        | Monoarthritis                                                                                             | Sacroiliac: No erosions, no bone edema or signs of sacroiliitis                                                                                                                         |
| Current series Case 2 | Female             | Melanoma                                                                      | None                      | Pembrolizumab                                                                    | PsA-like                                                                                                  | Hand: Bone marrow edema from second to fifth fingers in distal phalanges                                                                                                                |
| Current series Case 3 | Male               | Chronic myeloid leukemia                                                      | None                      | Anti-TIM3                                                                        | Tenosynovitis                                                                                             | Ankle: Tenosynovitis in common extensors                                                                                                                                                |
| Current series Case 4 | Male               | Liver carcinoma                                                               | None                      | Durvalumab                                                                       | Inflammatory arthritis                                                                                    | Whole body MRI: Glenohumeral synovitis and knee synovitis                                                                                                                               |

Anti-TIM3: Anti T cell immunoglobulin mucin domain 3; NA: Not available; OA: Osteoarthritis; RA: Rheumatoid arthritis; SpA: Spondyloarthritis.

**Supplementary Table S2** General characteristics of patients with ICI-induced arthritis with PET/CT scan assessment.

| Author [Ref]     | Gender              | Underlying disease         | Preexisting joint disease                         | Type of CPI                      | Clinical presentation                                       | PET-CT Findings                                                                                                                                                                                                                                                                                                                                            |
|------------------|---------------------|----------------------------|---------------------------------------------------|----------------------------------|-------------------------------------------------------------|------------------------------------------------------------------------------------------------------------------------------------------------------------------------------------------------------------------------------------------------------------------------------------------------------------------------------------------------------------|
| Schierz JH [25]  | Male                | Melanoma                   | NA                                                | 1. Nivolumab<br>2. Pembrolizumab | Arthritis and swollen arms and legs muscles                 | 1. Mildly increased uptake in the left knee and, bilaterally, in the mediastinal and hilar lymph nodes (sarcoid like)<br>2. Diffusely increased metabolic activity in the muscles (correlated with clinical findings of swollen arms and legs). Also showed a slight progression in left knee uptake, mildly increased uptake in the right knee and ankle. |
| Schierz JH [25]  | -                   | Melanoma                   | NA                                                | Nivolumab                        | PMR-like                                                    | Before treatment, diffusely increased uptake in the knees. After treatment, increased uptake in the interspinous bursae of the lumbar spine, highly suggestive of PMR, and a further increase in uptake in the knees.                                                                                                                                      |
| Leipe J [37]     | Female              | Melanoma                   | NA                                                | Nivolumab and Ipilimumab         | Inflammatory arthritis (RFA and anti-CCP positive) and PMR  | NA                                                                                                                                                                                                                                                                                                                                                         |
| Leipe J [37]     | Male                | Non-small cell lung cancer | NA                                                | Nivolumab                        | Seronegative monoarthritis                                  | NA                                                                                                                                                                                                                                                                                                                                                         |
| Leipe J [37]     | Male                | Melanoma                   | NA<br>(Other irAEs: pancreatitis, pruritus)       | Ipilimumab and Pembrolizumab     | Seronegative monoarthritis                                  | NA                                                                                                                                                                                                                                                                                                                                                         |
| Leipe J [37]     | Male                | Melanoma                   | NA<br>(Other irAEs: Colitis, myasthenic symptoms) | Pembrolizumab                    | Oligoarthritis and myositis seronegative                    | NA                                                                                                                                                                                                                                                                                                                                                         |
| Leipe J [37]     | Male                | Non-small cell lung cancer | NA                                                | Nivolumab                        | Oligoarthritis RF positive, anti-CCP negative               | NA                                                                                                                                                                                                                                                                                                                                                         |
| Nobashi T[41]    | -                   | Melanoma                   | NA                                                | Pembrolizumab                    | Intermittent joint and muscle pain                          | Symmetric FDG uptake in multiple joints: shoulder, elbows, wrist, hips, and knees and lymph nodes.                                                                                                                                                                                                                                                         |
| Maniu C [39]     | Male                | Melanoma                   | NA                                                | Ipilimumab                       | Progressive joint and muscular pain, fever, an RFA elevated | enhanced FDG uptake in muscle insertion of the extremities (shoulder, elbows, wrist, hips, and knees)                                                                                                                                                                                                                                                      |
| Nobashi T [27]   | 5 Male and 1 female | Melanoma                   | NA                                                | Pembrolizumab                    | Arthritis                                                   | NA                                                                                                                                                                                                                                                                                                                                                         |
| Nobashi T [38]   | Male                | Melanoma                   | NA                                                | Ipilimumab                       | Asymptomatic                                                | Diffuse FDG avidity of multiple joints.                                                                                                                                                                                                                                                                                                                    |
| Bronstein Y [27] | Female              | Melanoma                   | NA                                                | Ipilimumab                       | Inflammatory arthralgia and myalgia in both thighs          | symmetric increased FDG uptake in multiple joints and bilateral symmetric mildly FDG-avid hilar lymph nodes.                                                                                                                                                                                                                                               |
| Bronstein Y [27] | Female              | Melanoma                   | NA                                                | Ipilimumab                       | Asymptomatic                                                | FDG avidity sacroiliac synovitis                                                                                                                                                                                                                                                                                                                           |
| Bronstein Y [27] | Male                | Melanoma                   | NA                                                | Tremelimumab                     | Asymptomatic                                                | Bilateral symmetric FDG avid axillary lymphadenopathy,                                                                                                                                                                                                                                                                                                     |

|                                                                                                                         |         |                                                   |      |                              |       |                                                                                                                                                                                                                                                                               |
|-------------------------------------------------------------------------------------------------------------------------|---------|---------------------------------------------------|------|------------------------------|-------|-------------------------------------------------------------------------------------------------------------------------------------------------------------------------------------------------------------------------------------------------------------------------------|
|                                                                                                                         |         |                                                   |      |                              |       | bilateral synovial effusion, and FDG avidity in shoulder joints.                                                                                                                                                                                                              |
| Gauci ML [40]                                                                                                           | Male    | Melanoma                                          | NA   | Nivolumab                    | RS3PE | PET preformed 6 and 3 before the symptoms had already shown isolated hypermetabolism of the shoulder girdle and wrist.                                                                                                                                                        |
| Van Der Geest KSM [26]                                                                                                  | 5 cases | Bladder, squamous-lung, Lung adeno., Renal cancer | NA   | Pebrolizumab or Nivolumab    | PMR   | FDG uptake at the shoulders, hip joints, greater trochanter, ischial tuberosities, sternoclavicular joints and cervical/lumbar interspinous bursae. Four patients underwent PET-CT prior to ICI therapy. These scans showed a grade 1-2 FDG uptake at the shoulders and hips. |
| Current series                                                                                                          | Male    | Melanoma                                          | None | Nivolumab                    | PMR   | Symmetric FDG uptake shoulder, hip joints, greater trochanter and ischial tuberosities.                                                                                                                                                                                       |
| Current series                                                                                                          | Male    | Prostate                                          | None | Atezolizumab and Cabozatinib | PMR   | Symmetric FDG uptake shoulder, hip joints, greater trochanter and ischial tuberosities. Also showed a FDG uptake in left knee uptake. After discontinuation of the treatment, decreased the uptake (figure 4).                                                                |
| NA: Not available; PMR: Polymyalgia rheumatica; RS3PE: Remitting Seronegative Symmetrical Synovitis with Pitting Edema. |         |                                                   |      |                              |       |                                                                                                                                                                                                                                                                               |
